# Supplementary material
Source: MDPI journal article supplement (https://www.mdpi.com/2076-3417/11/15/6845)
Supplement: s1 [file s1]

Dataset-1

| Class | Precision | Recall | F1-Score | Accuracy |
|-------|-----------|--------|----------|----------|
| 0     | 0.97      | 1      | 0.98     | 1        |
| 1     | 0.99      | 1      | 1        | 1        |
| 2     | 0.99      | 1      | 0.99     | 0.99     |
| 3     | 0.98      | 1      | 0.99     | 1        |
| 4     | 1         | 1      | 1        | 1        |
| 5     | 0.98      | 0.99   | 0.99     | 0.99     |
| 6     | 0.99      | 0.96   | 0.98     | 0.96     |
| 7     | 1         | 0.99   | 0.99     | 0.98     |
| 8     | 1         | 1      | 1        | 0.99     |
| 9     | 1         | 0.97   | 0.98     | 0.96     |

Dataset-2

| Class | Precision | Recall | F1-Score | Accuracy |
|-------|-----------|--------|----------|----------|
| 0     | 1         | 0.98   | 0.99     | 0.98     |
| 1     | 1         | 1      | 1        | 1        |
| 2     | 0.98      | 1      | 0.99     | 1        |
| 3     | 1         | 1      | 1        | 1        |
| 4     | 0.97      | 1      | 0.98     | 1        |
| 5     | 1         | 1      | 1        | 1        |
| 6     | 0.98      | 0.97   | 0.97     | 0.96     |
| 7     | 0.98      | 0.98   | 0.98     | 0.98     |
| 8     | 1         | 1      | 1        | 1        |
| 9     | 1         | 1      | 1        | 1        |
| 10    | 1         | 1      | 1        | 1        |
| 11    | 0.98      | 1      | 0.99     | 1        |
| 12    | 0.98      | 1      | 0.99     | 1        |
| 13    | 1         | 1      | 1        | 1        |
| 14    | 1         | 1      | 1        | 1        |
| 15    | 1         | 1      | 1        | 1        |
| 16    | 1         | 1      | 1        | 1        |
| 17    | 1         | 1      | 1        | 1        |
| 18    | 0.94      | 1      | 0.97     | 1        |
| 19    | 0.95      | 1      | 0.98     | 1        |
| 20    | 0.97      | 1      | 0.98     | 1        |
| 21    | 1         | 1      | 1        | 1        |
| 22    | 1         | 1      | 1        | 1        |
| 23    | 1         | 1      | 1        | 1        |
| 24    | 1         | 0.97   | 0.98     | 0.96     |
| 25    | 1         | 0.98   | 0.99     | 0.98     |
| 26    | 1         | 0.98   | 0.99     | 0.98     |

|    |      |      |      |      |
|----|------|------|------|------|
| 27 | 1    | 1    | 1    | 1    |
| 28 | 0.98 | 0.98 | 0.98 | 0.98 |
| 29 | 0.95 | 1    | 0.98 | 1    |
| 30 | 1    | 0.92 | 0.96 | 0.91 |
| 31 | 1    | 1    | 1    | 1    |
| 32 | 1    | 0.97 | 0.98 | 0.96 |
| 33 | 1    | 1    | 1    | 1    |
| 34 | 0.98 | 0.98 | 0.98 | 0.98 |
| 35 | 0.97 | 0.98 | 0.98 | 0.98 |
| 36 | 1    | 0.97 | 0.98 | 0.96 |
| 37 | 0.98 | 1    | 0.99 | 1    |
| 38 | 1    | 1    | 1    | 1    |
| 39 | 1    | 1    | 1    | 1    |
| 40 | 0.98 | 1    | 0.99 | 1    |
| 41 | 1    | 0.98 | 0.99 | 0.98 |
| 42 | 1    | 1    | 1    | 1    |
| 43 | 1    | 1    | 1    | 1    |
| 44 | 0.98 | 0.95 | 0.97 | 0.95 |
| 45 | 1    | 0.97 | 0.98 | 0.96 |
| 46 | 0.95 | 0.98 | 0.97 | 0.98 |
| 47 | 0.98 | 0.98 | 0.98 | 0.98 |
| 48 | 0.98 | 0.98 | 0.98 | 0.98 |
| 49 | 1    | 0.97 | 0.98 | 0.96 |

Dataset-3

| Class | Precision | Recall | F1-Score | Accuracy |
|-------|-----------|--------|----------|----------|
| 0     | 1         | 1      | 1        | 1        |
| 1     | 0.98      | 1      | 0.99     | 1        |
| 2     | 1         | 1      | 1        | 1        |
| 3     | 0.98      | 1      | 0.99     | 1        |
| 4     | 0.95      | 0.97   | 0.96     | 0.97     |
| 5     | 1         | 0.98   | 0.99     | 0.98     |
| 6     | 1         | 1      | 1        | 1        |
| 7     | 1         | 1      | 1        | 1        |
| 8     | 1         | 1      | 1        | 1        |
| 9     | 1         | 1      | 1        | 1        |
| 10    | 1         | 1      | 1        | 1        |
| 11    | 1         | 1      | 1        | 1        |
| 12    | 0.98      | 1      | 0.99     | 1        |
| 13    | 0.98      | 1      | 0.99     | 1        |
| 14    | 1         | 1      | 1        | 1        |
| 15    | 1         | 0.96   | 0.98     | 0.96     |

|    |      |      |      |      |
|----|------|------|------|------|
| 16 | 0.98 | 1    | 0.99 | 1    |
| 17 | 0.98 | 1    | 0.99 | 1    |
| 18 | 1    | 1    | 1    | 1    |
| 19 | 0.94 | 0.7  | 0.81 | 0.7  |
| 20 | 1    | 1    | 1    | 1    |
| 21 | 1    | 1    | 1    | 1    |
| 22 | 1    | 1    | 1    | 1    |
| 23 | 1    | 0.98 | 0.99 | 0.98 |
| 24 | 1    | 1    | 1    | 1    |
| 25 | 0.98 | 1    | 0.99 | 1    |
| 26 | 0.95 | 1    | 0.98 | 1    |
| 27 | 1    | 1    | 1    | 1    |
| 28 | 1    | 1    | 1    | 1    |
| 29 | 0.96 | 1    | 0.98 | 1    |
| 30 | 1    | 1    | 1    | 1    |
| 31 | 1    | 0.94 | 0.97 | 0.94 |
| 32 | 0.98 | 0.98 | 0.98 | 0.97 |
| 33 | 1    | 0.98 | 0.99 | 0.98 |
| 34 | 1    | 1    | 1    | 1    |
| 35 | 1    | 1    | 1    | 1    |
| 36 | 0.97 | 0.95 | 0.96 | 0.94 |
| 37 | 1    | 1    | 1    | 1    |
| 38 | 0.98 | 0.97 | 0.97 | 0.96 |
| 39 | 0.78 | 0.98 | 0.87 | 0.97 |
| 40 | 1    | 1    | 1    | 1    |
| 41 | 1    | 0.98 | 0.99 | 0.97 |
| 42 | 0.98 | 1    | 0.99 | 1    |
| 43 | 0.92 | 1    | 0.96 | 1    |
| 44 | 1    | 1    | 1    | 1    |
| 45 | 1    | 1    | 1    | 1    |
| 46 | 1    | 1    | 1    | 1    |
| 47 | 1    | 1    | 1    | 1    |
| 48 | 0.98 | 1    | 0.99 | 1    |
| 49 | 1    | 1    | 1    | 1    |
| 50 | 1    | 1    | 1    | 1    |
| 51 | 0.98 | 1    | 0.99 | 1    |
| 52 | 0.99 | 1    | 0.99 | 1    |
| 53 | 1    | 1    | 1    | 1    |
| 54 | 1    | 1    | 1    | 1    |
| 55 | 0.98 | 1    | 0.99 | 1    |
| 56 | 1    | 1    | 1    | 1    |
| 57 | 1    | 1    | 1    | 1    |
| 58 | 0.9  | 1    | 0.95 | 1    |

|     |      |      |      |      |
|-----|------|------|------|------|
| 59  | 0.96 | 1    | 0.98 | 1    |
| 60  | 0.98 | 1    | 0.99 | 1    |
| 61  | 1    | 1    | 1    | 1    |
| 62  | 1    | 1    | 1    | 1    |
| 63  | 0.98 | 1    | 0.99 | 1    |
| 64  | 1    | 1    | 1    | 1    |
| 65  | 1    | 0.98 | 0.99 | 0.98 |
| 66  | 1    | 1    | 1    | 1    |
| 67  | 0.98 | 1    | 0.99 | 1    |
| 68  | 0.98 | 1    | 0.99 | 1    |
| 69  | 0.92 | 0.96 | 0.94 | 0.96 |
| 70  | 1    | 0.98 | 0.99 | 0.98 |
| 71  | 1    | 1    | 1    | 1    |
| 72  | 1    | 1    | 1    | 1    |
| 73  | 0.98 | 1    | 0.99 | 1    |
| 74  | 0.94 | 1    | 0.97 | 1    |
| 75  | 1    | 1    | 1    | 1    |
| 76  | 0.94 | 1    | 0.97 | 1    |
| 77  | 0.96 | 1    | 0.98 | 1    |
| 78  | 0.96 | 1    | 0.98 | 1    |
| 79  | 0.98 | 1    | 0.99 | 1    |
| 80  | 0.96 | 1    | 0.98 | 1    |
| 81  | 0.87 | 1    | 0.93 | 1    |
| 82  | 0.96 | 1    | 0.98 | 1    |
| 83  | 1    | 1    | 1    | 1    |
| 84  | 0.93 | 1    | 0.97 | 1    |
| 85  | 0.98 | 0.94 | 0.96 | 0.94 |
| 86  | 1    | 0.96 | 0.98 | 0.95 |
| 87  | 1    | 0.96 | 0.98 | 0.96 |
| 88  | 1    | 1    | 1    | 1    |
| 89  | 1    | 0.98 | 0.99 | 0.97 |
| 90  | 1    | 0.97 | 0.99 | 0.97 |
| 91  | 0.98 | 0.94 | 0.96 | 0.94 |
| 92  | 1    | 0.98 | 0.99 | 0.98 |
| 93  | 0.98 | 0.96 | 0.97 | 0.96 |
| 94  | 1    | 0.98 | 0.99 | 0.97 |
| 95  | 0.93 | 0.98 | 0.96 | 0.98 |
| 96  | 1    | 0.93 | 0.96 | 0.92 |
| 97  | 1    | 1    | 1    | 1    |
| 98  | 1    | 1    | 1    | 1    |
| 99  | 0.96 | 0.98 | 0.97 | 0.97 |
| 100 | 0.96 | 0.94 | 0.95 | 0.94 |
| 101 | 1    | 0.98 | 0.99 | 0.98 |

|     |      |      |      |      |
|-----|------|------|------|------|
| 102 | 1    | 0.98 | 0.99 | 0.98 |
| 103 | 1    | 0.99 | 0.99 | 0.98 |
| 104 | 0.97 | 0.95 | 0.96 | 0.95 |
| 105 | 1    | 1    | 1    | 1    |
| 106 | 0.98 | 0.88 | 0.93 | 0.88 |
| 107 | 0.96 | 1    | 0.98 | 1    |
| 108 | 1    | 1    | 1    | 1    |
| 109 | 0.93 | 0.96 | 0.95 | 0.96 |
| 110 | 0.95 | 0.93 | 0.94 | 0.92 |
| 111 | 1    | 1    | 1    | 1    |
| 112 | 1    | 1    | 1    | 1    |
| 113 | 0.96 | 0.98 | 0.97 | 0.98 |
| 114 | 1    | 1    | 1    | 1    |
| 115 | 0.96 | 0.96 | 0.96 | 0.95 |
| 116 | 1    | 1    | 1    | 1    |
| 117 | 1    | 0.96 | 0.98 | 0.95 |
| 118 | 1    | 1    | 1    | 1    |
| 119 | 0.98 | 0.98 | 0.98 | 0.98 |
| 120 | 1    | 0.96 | 0.98 | 0.96 |
| 121 | 1    | 0.93 | 0.96 | 0.93 |
| 122 | 1    | 1    | 1    | 1    |
| 123 | 1    | 1    | 1    | 1    |
| 124 | 1    | 1    | 1    | 1    |
| 125 | 1    | 1    | 1    | 1    |
| 126 | 1    | 1    | 1    | 1    |
| 127 | 1    | 0.98 | 0.99 | 0.97 |
| 128 | 0.96 | 1    | 0.98 | 1    |
| 129 | 0.98 | 1    | 0.99 | 1    |
| 130 | 1    | 1    | 1    | 1    |
| 131 | 1    | 0.96 | 0.98 | 0.96 |
| 132 | 0.98 | 1    | 0.99 | 1    |
| 133 | 1    | 0.98 | 0.99 | 0.98 |
| 134 | 1    | 0.98 | 0.99 | 0.98 |
| 135 | 0.98 | 0.92 | 0.95 | 0.91 |
| 136 | 1    | 1    | 1    | 1    |
| 137 | 1    | 1    | 1    | 1    |
| 138 | 0.94 | 0.96 | 0.95 | 0.95 |
| 139 | 1    | 0.86 | 0.93 | 0.86 |
| 140 | 0.98 | 1    | 0.99 | 0.99 |
| 141 | 0.96 | 0.98 | 0.97 | 0.97 |
| 142 | 0.96 | 0.94 | 0.95 | 0.93 |
| 143 | 1    | 0.9  | 0.95 | 0.9  |
| 144 | 0.98 | 0.92 | 0.95 | 0.92 |

|     |      |      |      |      |
|-----|------|------|------|------|
| 145 | 1    | 1    | 1    | 1    |
| 146 | 0.94 | 0.98 | 0.96 | 0.97 |
| 147 | 1    | 1    | 1    | 1    |
| 148 | 1    | 0.95 | 0.97 | 0.95 |
| 149 | 0.92 | 0.96 | 0.94 | 0.95 |
| 150 | 1    | 1    | 1    | 1    |
| 151 | 1    | 0.9  | 0.95 | 0.89 |
| 152 | 0.98 | 1    | 0.99 | 1    |
| 153 | 1    | 1    | 1    | 1    |
| 154 | 0.98 | 1    | 0.99 | 1    |
| 155 | 1    | 1    | 1    | 1    |
| 156 | 0.95 | 0.95 | 0.95 | 0.95 |
| 157 | 1    | 1    | 1    | 1    |
| 158 | 1    | 1    | 1    | 1    |
| 159 | 0.96 | 1    | 0.98 | 1    |
| 160 | 1    | 0.96 | 0.98 | 0.96 |
| 161 | 1    | 0.98 | 0.99 | 0.98 |
| 162 | 1    | 1    | 1    | 1    |
| 163 | 1    | 1    | 1    | 1    |
| 164 | 1    | 1    | 1    | 1    |
| 165 | 0.98 | 0.98 | 0.98 | 0.98 |
| 166 | 1    | 1    | 1    | 1    |
| 167 | 1    | 0.98 | 0.99 | 0.97 |
| 168 | 0.97 | 0.98 | 0.97 | 0.98 |
| 169 | 1    | 1    | 1    | 1    |
| 170 | 1    | 0.98 | 0.99 | 0.97 |

Dataset-4

| Class | Precision | Recall | F1-Score | Accuracy |
|-------|-----------|--------|----------|----------|
| 0     | 0.96      | 1      | 0.98     | 1        |
| 1     | 0.9       | 1      | 0.95     | 1        |
| 2     | 0.98      | 0.98   | 0.98     | 0.97     |
| 3     | 0.96      | 0.98   | 0.97     | 0.97     |
| 4     | 0.98      | 0.98   | 0.98     | 0.97     |
| 5     | 0.93      | 0.96   | 0.94     | 0.96     |
| 6     | 0.98      | 0.98   | 0.98     | 0.97     |
| 7     | 0.95      | 0.95   | 0.95     | 0.95     |
| 8     | 0.95      | 1      | 0.98     | 1        |
| 9     | 0.98      | 1      | 0.99     | 1        |
| 10    | 0.98      | 0.98   | 0.98     | 0.97     |
| 11    | 0.91      | 0.98   | 0.94     | 0.98     |
| 12    | 0.98      | 1      | 0.99     | 1        |

|    |      |      |      |      |
|----|------|------|------|------|
| 13 | 1    | 0.96 | 0.98 | 0.95 |
| 14 | 0.98 | 1    | 0.99 | 1    |
| 15 | 0.96 | 0.92 | 0.94 | 0.92 |
| 16 | 1    | 1    | 1    | 1    |
| 17 | 0.97 | 0.91 | 0.94 | 0.9  |
| 18 | 0.89 | 0.68 | 0.77 | 0.68 |
| 19 | 0.92 | 0.86 | 0.89 | 0.86 |
| 20 | 0.98 | 0.98 | 0.98 | 0.97 |
| 21 | 1    | 0.96 | 0.98 | 0.96 |
| 22 | 0.94 | 0.94 | 0.94 | 0.93 |
| 23 | 1    | 0.97 | 0.98 | 0.96 |
| 24 | 0.98 | 0.96 | 0.97 | 0.95 |
| 25 | 0.98 | 0.96 | 0.97 | 0.95 |
| 26 | 1    | 1    | 1    | 1    |
| 27 | 1    | 0.96 | 0.98 | 0.96 |
| 28 | 0.95 | 1    | 0.98 | 1    |
| 29 | 0.87 | 0.8  | 0.83 | 0.8  |
| 30 | 0.98 | 0.98 | 0.98 | 0.98 |
| 31 | 0.94 | 0.94 | 0.94 | 0.94 |
| 32 | 0.93 | 0.95 | 0.94 | 0.95 |
| 33 | 0.93 | 0.95 | 0.94 | 0.94 |
| 34 | 0.98 | 0.98 | 0.98 | 0.98 |
| 35 | 1    | 1    | 1    | 1    |
| 36 | 0.97 | 0.9  | 0.93 | 0.89 |
| 37 | 1    | 0.97 | 0.99 | 0.97 |
| 38 | 0.95 | 0.98 | 0.97 | 0.98 |
| 39 | 0.76 | 0.93 | 0.84 | 0.93 |
| 40 | 1    | 1    | 1    | 1    |
| 41 | 1    | 1    | 1    | 1    |
| 42 | 1    | 1    | 1    | 1    |
| 43 | 0.88 | 0.86 | 0.87 | 0.86 |
| 44 | 0.94 | 1    | 0.97 | 1    |
| 45 | 1    | 0.98 | 0.99 | 0.97 |
| 46 | 1    | 0.98 | 0.99 | 0.97 |
| 47 | 1    | 0.93 | 0.96 | 0.92 |
| 48 | 0.96 | 0.96 | 0.96 | 0.95 |
| 49 | 0.98 | 0.98 | 0.98 | 0.98 |
| 50 | 1    | 0.96 | 0.98 | 0.95 |
| 51 | 0.98 | 0.98 | 0.98 | 0.98 |
| 52 | 0.94 | 0.99 | 0.96 | 0.98 |
| 53 | 0.92 | 1    | 0.96 | 1    |
| 54 | 1    | 1    | 1    | 1    |
| 55 | 0.98 | 0.98 | 0.98 | 0.97 |

|    |      |      |      |      |
|----|------|------|------|------|
| 56 | 0.98 | 1    | 0.99 | 1    |
| 57 | 0.98 | 0.94 | 0.96 | 0.94 |
| 58 | 1    | 0.96 | 0.98 | 0.95 |
| 59 | 0.74 | 0.73 | 0.74 | 0.72 |
| 60 | 0.95 | 1    | 0.98 | 1    |
| 61 | 0.98 | 1    | 0.99 | 1    |
| 62 | 0.94 | 0.98 | 0.96 | 0.97 |
| 63 | 0.94 | 0.96 | 0.95 | 0.95 |
| 64 | 0.96 | 1    | 0.98 | 1    |
| 65 | 0.94 | 0.94 | 0.94 | 0.94 |
| 66 | 1    | 0.98 | 0.99 | 0.97 |
| 67 | 0.98 | 1    | 0.99 | 1    |
| 68 | 0.96 | 0.94 | 0.95 | 0.94 |
| 69 | 0.96 | 1    | 0.98 | 1    |
| 70 | 1    | 0.98 | 0.99 | 0.98 |
| 71 | 0.98 | 1    | 0.99 | 1    |
| 72 | 1    | 0.97 | 0.98 | 0.96 |
| 73 | 0.98 | 1    | 0.99 | 1    |
| 74 | 0.94 | 1    | 0.97 | 1    |
| 75 | 1    | 1    | 1    | 1    |
| 76 | 0.98 | 1    | 0.99 | 1    |
| 77 | 0.96 | 0.98 | 0.97 | 0.98 |
| 78 | 1    | 0.98 | 0.99 | 0.98 |
| 79 | 0.93 | 0.98 | 0.95 | 0.98 |
| 80 | 1    | 1    | 1    | 1    |
| 81 | 0.67 | 0.7  | 0.68 | 0.7  |
| 82 | 0.91 | 1    | 0.95 | 1    |
| 83 | 1    | 0.98 | 0.99 | 0.97 |
| 84 | 0.89 | 0.91 | 0.9  | 0.9  |
| 85 | 0.89 | 0.94 | 0.91 | 0.94 |
| 86 | 0.98 | 0.98 | 0.98 | 0.98 |
| 87 | 0.85 | 0.88 | 0.87 | 0.88 |
| 88 | 0.98 | 0.96 | 0.97 | 0.96 |
| 89 | 0.94 | 0.96 | 0.95 | 0.95 |
| 90 | 0.98 | 0.98 | 0.98 | 0.97 |
| 91 | 0.96 | 0.88 | 0.92 | 0.88 |
| 92 | 0.98 | 0.96 | 0.97 | 0.96 |
| 93 | 1    | 0.93 | 0.96 | 0.92 |
| 94 | 0.92 | 0.98 | 0.95 | 0.97 |
| 95 | 0.94 | 0.98 | 0.96 | 0.98 |
| 96 | 1    | 0.98 | 0.99 | 0.97 |
| 97 | 1    | 0.98 | 0.99 | 0.97 |
| 98 | 1    | 1    | 1    | 1    |



|     |      |      |      |      |
|-----|------|------|------|------|
| 99  | 0.86 | 0.95 | 0.9  | 0.95 |
| 100 | 1    | 0.91 | 0.95 | 0.9  |
| 101 | 1    | 1    | 1    | 1    |
| 102 | 1    | 1    | 1    | 1    |
| 103 | 0.97 | 1    | 0.99 | 1    |
| 104 | 0.97 | 0.9  | 0.94 | 0.9  |
| 105 | 0.96 | 0.98 | 0.97 | 0.98 |
| 106 | 1    | 0.94 | 0.97 | 0.94 |
| 107 | 0.96 | 0.94 | 0.95 | 0.94 |
| 108 | 1    | 0.98 | 0.99 | 0.98 |
| 109 | 0.93 | 0.91 | 0.92 | 0.91 |
| 110 | 0.95 | 1    | 0.98 | 1    |
| 111 | 0.94 | 0.96 | 0.95 | 0.96 |
| 112 | 0.98 | 0.96 | 0.97 | 0.96 |
| 113 | 1    | 1    | 1    | 1    |
| 114 | 1    | 0.96 | 0.98 | 0.96 |
| 115 | 0.92 | 0.96 | 0.94 | 0.96 |
| 116 | 0.98 | 1    | 0.99 | 1    |
| 117 | 0.98 | 0.96 | 0.97 | 0.95 |
| 118 | 1    | 1    | 1    | 1    |
| 119 | 1    | 1    | 1    | 1    |
| 120 | 0.98 | 1    | 0.99 | 1    |
| 121 | 1    | 0.93 | 0.96 | 0.93 |
| 122 | 0.98 | 0.98 | 0.98 | 0.98 |
| 123 | 0.98 | 0.87 | 0.92 | 0.87 |
| 124 | 1    | 0.98 | 0.99 | 0.98 |
| 125 | 1    | 1    | 1    | 1    |
| 126 | 0.95 | 0.97 | 0.96 | 0.97 |
| 127 | 0.98 | 0.94 | 0.96 | 0.93 |
| 128 | 0.96 | 0.93 | 0.94 | 0.92 |
| 129 | 1    | 1    | 1    | 1    |
| 130 | 0.98 | 1    | 0.99 | 1    |
| 131 | 0.91 | 1    | 0.95 | 1    |
| 132 | 0.94 | 0.98 | 0.96 | 0.98 |
| 133 | 1    | 0.98 | 0.99 | 0.98 |
| 134 | 1    | 0.93 | 0.96 | 0.93 |
| 135 | 1    | 0.98 | 0.99 | 0.98 |
| 136 | 1    | 0.98 | 0.99 | 0.98 |
| 137 | 0.98 | 1    | 0.99 | 1    |
| 138 | 0.89 | 0.96 | 0.92 | 0.96 |
| 139 | 1    | 0.98 | 0.99 | 0.98 |
| 140 | 0.86 | 0.98 | 0.92 | 0.97 |
| 141 | 0.74 | 0.7  | 0.72 | 0.69 |

|     |      |      |      |      |
|-----|------|------|------|------|
| 142 | 0.94 | 0.93 | 0.93 | 0.92 |
| 143 | 0.81 | 0.81 | 0.81 | 0.81 |
| 144 | 0.98 | 0.93 | 0.95 | 0.92 |
| 145 | 1    | 0.98 | 0.99 | 0.97 |
| 146 | 0.93 | 1    | 0.96 | 1    |
| 147 | 0.96 | 0.92 | 0.94 | 0.92 |
| 148 | 1    | 0.97 | 0.99 | 0.97 |
| 149 | 0.96 | 0.88 | 0.91 | 0.87 |
| 150 | 1    | 0.96 | 0.98 | 0.95 |
| 151 | 0.87 | 0.87 | 0.87 | 0.86 |
| 152 | 0.98 | 1    | 0.99 | 1    |
| 153 | 1    | 1    | 1    | 1    |
| 154 | 1    | 1    | 1    | 1    |
| 155 | 1    | 0.96 | 0.98 | 0.96 |
| 156 | 1    | 1    | 1    | 1    |
| 157 | 1    | 0.93 | 0.96 | 0.92 |
| 158 | 0.94 | 0.98 | 0.96 | 0.97 |
| 159 | 0.96 | 0.94 | 0.95 | 0.94 |
| 160 | 0.97 | 0.97 | 0.97 | 0.96 |
| 161 | 0.93 | 0.98 | 0.95 | 0.98 |
| 162 | 0.98 | 0.94 | 0.96 | 0.94 |
| 163 | 0.98 | 0.98 | 0.98 | 0.97 |
| 164 | 0.98 | 1    | 0.99 | 1    |
| 165 | 0.96 | 0.94 | 0.95 | 0.94 |
| 166 | 0.93 | 0.98 | 0.95 | 0.98 |
| 167 | 0.98 | 1    | 0.99 | 1    |
| 168 | 0.98 | 0.98 | 0.98 | 0.98 |
| 169 | 0.94 | 0.92 | 0.93 | 0.91 |
| 170 | 1    | 1    | 1    | 1    |

Dataset-5

| Class | Precision | Recall | F1-Score | Accuracy |
|-------|-----------|--------|----------|----------|
| 0     | 0.96      | 1      | 0.98     | 1        |
| 1     | 0.97      | 0.94   | 0.95     | 0.93     |
| 2     | 0.96      | 0.98   | 0.97     | 0.98     |
| 3     | 0.98      | 0.98   | 0.98     | 0.97     |
| 4     | 0.98      | 0.96   | 0.97     | 0.95     |
| 5     | 0.96      | 0.96   | 0.96     | 0.96     |
| 6     | 0.96      | 0.92   | 0.94     | 0.92     |
| 7     | 0.89      | 0.96   | 0.92     | 0.96     |
| 8     | 0.96      | 1      | 0.98     | 1        |
| 9     | 0.96      | 0.92   | 0.94     | 0.92     |

|    |      |      |      |      |
|----|------|------|------|------|
| 10 | 0.94 | 0.96 | 0.95 | 0.95 |
| 11 | 1    | 1    | 1    | 1    |
| 12 | 0.87 | 0.98 | 0.92 | 0.98 |
| 13 | 0.87 | 1    | 0.93 | 1    |
| 14 | 1    | 1    | 1    | 1    |
| 15 | 0.96 | 1    | 0.98 | 1    |
| 16 | 0.98 | 1    | 0.99 | 1    |
| 17 | 0.92 | 0.92 | 0.92 | 0.92 |
| 18 | 0.92 | 0.96 | 0.94 | 0.95 |
| 19 | 0.94 | 0.97 | 0.96 | 0.97 |
| 20 | 1    | 1    | 1    | 1    |
| 21 | 0.96 | 0.98 | 0.97 | 0.97 |
| 22 | 0.98 | 0.98 | 0.98 | 0.97 |
| 23 | 1    | 1    | 1    | 1    |
| 24 | 0.95 | 0.98 | 0.96 | 0.97 |
| 25 | 0.96 | 0.96 | 0.96 | 0.96 |
| 26 | 0.96 | 0.96 | 0.96 | 0.96 |
| 27 | 1    | 0.98 | 0.99 | 0.97 |
| 28 | 0.93 | 0.98 | 0.95 | 0.97 |
| 29 | 0.98 | 1    | 0.99 | 1    |
| 30 | 0.98 | 1    | 0.99 | 1    |
| 31 | 1    | 1    | 1    | 1    |
| 32 | 0.92 | 0.94 | 0.93 | 0.94 |
| 33 | 1    | 0.98 | 0.99 | 0.97 |
| 34 | 0.96 | 0.96 | 0.96 | 0.96 |
| 35 | 0.94 | 1    | 0.97 | 1    |
| 36 | 0.96 | 0.96 | 0.96 | 0.96 |
| 37 | 0.93 | 0.96 | 0.94 | 0.96 |
| 38 | 0.98 | 1    | 0.99 | 1    |
| 39 | 0.97 | 0.91 | 0.94 | 0.9  |
| 40 | 0.89 | 0.68 | 0.77 | 0.68 |
| 41 | 0.96 | 0.9  | 0.93 | 0.9  |
| 42 | 0.96 | 1    | 0.98 | 1    |
| 43 | 1    | 0.94 | 0.97 | 0.94 |
| 44 | 0.94 | 0.94 | 0.94 | 0.93 |
| 45 | 0.97 | 0.97 | 0.97 | 0.96 |
| 46 | 0.98 | 0.94 | 0.96 | 0.93 |
| 47 | 0.98 | 0.98 | 0.98 | 0.97 |
| 48 | 1    | 0.95 | 0.98 | 0.95 |
| 49 | 1    | 0.98 | 0.99 | 0.98 |
| 50 | 1    | 1    | 1    | 1    |
| 51 | 0.8  | 0.9  | 0.85 | 0.9  |
| 52 | 1    | 1    | 1    | 1    |

|    |      |      |      |      |
|----|------|------|------|------|
| 53 | 0.93 | 1    | 0.96 | 1    |
| 54 | 0.93 | 0.96 | 0.95 | 0.96 |
| 55 | 0.95 | 0.95 | 0.95 | 0.95 |
| 56 | 1    | 0.98 | 0.99 | 0.98 |
| 57 | 0.93 | 1    | 0.97 | 1    |
| 58 | 0.97 | 0.93 | 0.95 | 0.93 |
| 59 | 1    | 1    | 1    | 1    |
| 60 | 1    | 1    | 1    | 1    |
| 61 | 0.88 | 0.81 | 0.84 | 0.8  |
| 62 | 0.81 | 0.84 | 0.82 | 0.84 |
| 63 | 0.97 | 0.97 | 0.97 | 0.97 |
| 64 | 1    | 0.96 | 0.98 | 0.96 |
| 65 | 1    | 1    | 1    | 1    |
| 66 | 0.79 | 0.91 | 0.85 | 0.91 |
| 67 | 0.98 | 0.96 | 0.97 | 0.95 |
| 68 | 0.96 | 0.98 | 0.97 | 0.97 |
| 69 | 1    | 1    | 1    | 1    |
| 70 | 1    | 1    | 1    | 1    |
| 71 | 0.9  | 0.88 | 0.89 | 0.88 |
| 72 | 0.96 | 0.96 | 0.96 | 0.95 |
| 73 | 1    | 0.98 | 0.99 | 0.97 |
| 74 | 1    | 0.9  | 0.95 | 0.9  |
| 75 | 1    | 0.96 | 0.98 | 0.95 |
| 76 | 0.94 | 0.96 | 0.95 | 0.96 |
| 77 | 1    | 0.96 | 0.98 | 0.95 |
| 78 | 0.96 | 1    | 0.98 | 1    |
| 79 | 0.85 | 0.92 | 0.88 | 0.92 |
| 80 | 0.91 | 0.84 | 0.87 | 0.84 |
| 81 | 1    | 0.97 | 0.99 | 0.97 |
| 82 | 0.93 | 1    | 0.96 | 1    |
| 83 | 0.94 | 0.96 | 0.95 | 0.95 |
| 84 | 1    | 1    | 1    | 1    |
| 85 | 1    | 1    | 1    | 1    |
| 86 | 0.92 | 0.92 | 0.92 | 0.92 |
| 87 | 0.92 | 0.96 | 0.94 | 0.96 |
| 88 | 0.72 | 0.82 | 0.77 | 0.81 |
| 89 | 0.97 | 0.97 | 0.97 | 0.96 |
| 90 | 1    | 0.96 | 0.98 | 0.95 |
| 91 | 0.98 | 1    | 0.99 | 1    |
| 92 | 0.96 | 0.96 | 0.96 | 0.95 |
| 93 | 0.92 | 0.98 | 0.95 | 0.97 |
| 94 | 0.98 | 0.92 | 0.95 | 0.91 |
| 95 | 1    | 1    | 1    | 1    |

|     |      |      |      |      |
|-----|------|------|------|------|
| 96  | 0.98 | 0.98 | 0.98 | 0.98 |
| 97  | 0.98 | 0.98 | 0.98 | 0.97 |
| 98  | 0.92 | 0.96 | 0.94 | 0.96 |
| 99  | 0.96 | 1    | 0.98 | 1    |
| 100 | 0.96 | 0.98 | 0.97 | 0.98 |
| 101 | 0.98 | 1    | 0.99 | 1    |
| 102 | 0.98 | 0.96 | 0.97 | 0.96 |
| 103 | 1    | 0.97 | 0.98 | 0.96 |
| 104 | 1    | 0.98 | 0.99 | 0.97 |
| 105 | 0.98 | 1    | 0.99 | 1    |
| 106 | 1    | 1    | 1    | 1    |
| 107 | 0.96 | 1    | 0.98 | 1    |
| 108 | 0.96 | 0.98 | 0.97 | 0.98 |
| 109 | 0.96 | 1    | 0.98 | 1    |
| 110 | 0.96 | 0.98 | 0.97 | 0.97 |
| 111 | 1    | 0.98 | 0.99 | 0.97 |
| 112 | 1    | 0.98 | 0.99 | 0.98 |
| 113 | 0.65 | 0.75 | 0.7  | 0.75 |
| 114 | 0.95 | 1    | 0.97 | 1    |
| 115 | 0.88 | 1    | 0.94 | 1    |
| 116 | 0.87 | 0.92 | 0.89 | 0.92 |
| 117 | 0.98 | 1    | 0.99 | 1    |
| 118 | 0.91 | 0.76 | 0.83 | 0.76 |
| 119 | 0.98 | 0.96 | 0.97 | 0.96 |
| 120 | 0.94 | 0.98 | 0.96 | 0.97 |
| 121 | 0.93 | 0.98 | 0.95 | 0.97 |
| 122 | 0.92 | 0.98 | 0.95 | 0.97 |
| 123 | 0.96 | 0.92 | 0.94 | 0.92 |
| 124 | 0.98 | 0.94 | 0.96 | 0.94 |
| 125 | 0.92 | 0.86 | 0.89 | 0.85 |
| 126 | 0.91 | 0.81 | 0.86 | 0.8  |
| 127 | 0.93 | 1    | 0.96 | 1    |
| 128 | 1    | 0.97 | 0.98 | 0.96 |
| 129 | 0.95 | 1    | 0.98 | 1    |
| 130 | 1    | 0.98 | 0.99 | 0.97 |
| 131 | 0.98 | 1    | 0.99 | 1    |
| 132 | 0.85 | 0.93 | 0.89 | 0.93 |
| 133 | 0.98 | 0.98 | 0.98 | 0.98 |
| 134 | 0.98 | 0.91 | 0.94 | 0.9  |
| 135 | 0.98 | 0.98 | 0.98 | 0.98 |
| 136 | 1    | 1    | 1    | 1    |
| 137 | 1    | 0.96 | 0.98 | 0.96 |
| 138 | 0.98 | 1    | 0.99 | 1    |

|     |      |      |      |      |
|-----|------|------|------|------|
| 139 | 0.97 | 0.88 | 0.92 | 0.87 |
| 140 | 0.96 | 0.93 | 0.95 | 0.93 |
| 141 | 0.74 | 0.7  | 0.72 | 0.69 |
| 142 | 1    | 1    | 1    | 1    |
| 143 | 1    | 0.94 | 0.97 | 0.94 |
| 144 | 0.98 | 0.98 | 0.98 | 0.98 |
| 145 | 0.88 | 0.88 | 0.88 | 0.88 |
| 146 | 0.97 | 0.93 | 0.95 | 0.93 |
| 147 | 1    | 1    | 1    | 1    |
| 148 | 1    | 0.98 | 0.99 | 0.98 |
| 149 | 1    | 0.96 | 0.98 | 0.96 |
| 150 | 0.98 | 0.98 | 0.98 | 0.98 |
| 151 | 1    | 0.98 | 0.99 | 0.98 |
| 152 | 0.94 | 0.98 | 0.96 | 0.98 |
| 153 | 0.96 | 0.96 | 0.96 | 0.95 |
| 154 | 1    | 1    | 1    | 1    |
| 155 | 0.96 | 0.98 | 0.97 | 0.97 |
| 156 | 1    | 0.98 | 0.99 | 0.98 |
| 157 | 1    | 1    | 1    | 1    |
| 158 | 0.98 | 0.93 | 0.95 | 0.93 |
| 159 | 0.98 | 1    | 0.99 | 1    |
| 160 | 0.98 | 0.87 | 0.92 | 0.87 |
| 161 | 1    | 0.98 | 0.99 | 0.98 |
| 162 | 1    | 1    | 1    | 1    |
| 163 | 1    | 0.97 | 0.99 | 0.97 |
| 164 | 0.92 | 0.92 | 0.92 | 0.92 |
| 165 | 0.87 | 0.93 | 0.9  | 0.92 |
| 166 | 0.92 | 0.94 | 0.93 | 0.94 |
| 167 | 1    | 1    | 1    | 1    |
| 168 | 1    | 1    | 1    | 1    |
| 169 | 1    | 0.96 | 0.98 | 0.96 |
| 170 | 0.93 | 1    | 0.96 | 1    |
| 171 | 0.94 | 0.98 | 0.96 | 0.98 |
| 172 | 1    | 0.98 | 0.99 | 0.98 |
| 173 | 1    | 0.95 | 0.97 | 0.94 |
| 174 | 0.94 | 0.97 | 0.96 | 0.97 |
| 175 | 1    | 0.97 | 0.98 | 0.96 |
| 176 | 1    | 0.94 | 0.97 | 0.94 |
| 177 | 0.93 | 0.86 | 0.89 | 0.85 |
| 178 | 1    | 0.96 | 0.98 | 0.96 |
| 179 | 0.98 | 0.98 | 0.98 | 0.98 |
| 180 | 0.73 | 0.65 | 0.69 | 0.65 |
| 181 | 0.96 | 0.98 | 0.97 | 0.97 |

|     |      |      |      |      |
|-----|------|------|------|------|
| 182 | 0.98 | 0.94 | 0.96 | 0.94 |
| 183 | 0.83 | 0.77 | 0.8  | 0.76 |
| 184 | 1    | 0.84 | 0.91 | 0.84 |
| 185 | 0.97 | 1    | 0.98 | 1    |
| 186 | 0.98 | 0.98 | 0.98 | 0.97 |
| 187 | 0.93 | 0.98 | 0.95 | 0.98 |
| 188 | 0.96 | 1    | 0.98 | 1    |
| 189 | 0.98 | 0.94 | 0.96 | 0.94 |
| 190 | 0.95 | 0.97 | 0.96 | 0.97 |
| 191 | 1    | 1    | 1    | 1    |
| 192 | 0.88 | 0.87 | 0.87 | 0.86 |
| 193 | 1    | 0.98 | 0.99 | 0.98 |
| 194 | 0.98 | 1    | 0.99 | 1    |
| 195 | 0.96 | 0.92 | 0.94 | 0.92 |
| 196 | 0.93 | 0.96 | 0.95 | 0.96 |
| 197 | 1    | 0.96 | 0.98 | 0.96 |
| 198 | 0.92 | 0.96 | 0.94 | 0.96 |

Dataset-6

| Class | Precision | Recall | F1-Score | Accuracy |
|-------|-----------|--------|----------|----------|
| 0     | 0.97      | 1      | 0.98     | 1        |
| 1     | 0.98      | 1      | 0.99     | 1        |
| 2     | 0.92      | 0.98   | 0.95     | 0.98     |
| 3     | 0.98      | 0.91   | 0.95     | 0.91     |
| 4     | 1         | 0.98   | 0.99     | 0.98     |
| 5     | 1         | 1      | 1        | 1        |
| 6     | 1         | 0.96   | 0.98     | 0.96     |

Dataset-7

| Class | Precision | Recall | F1-Score | Accuracy |
|-------|-----------|--------|----------|----------|
| 0     | 1         | 1      | 1        | 1        |
| 1     | 1         | 0.94   | 0.97     | 0.93     |
| 2     | 0.96      | 0.92   | 0.94     | 0.92     |
| 3     | 1         | 0.95   | 0.97     | 0.95     |
| 4     | 0.96      | 0.96   | 0.96     | 0.95     |
| 5     | 0.96      | 0.96   | 0.96     | 0.96     |
| 6     | 1         | 0.96   | 0.98     | 0.96     |
| 7     | 0.92      | 0.96   | 0.94     | 0.96     |
| 8     | 0.87      | 1      | 0.93     | 1        |
| 9     | 0.98      | 1      | 0.99     | 1        |
| 10    | 0.98      | 0.96   | 0.97     | 0.95     |

|    |      |      |      |      |
|----|------|------|------|------|
| 11 | 1    | 0.96 | 0.98 | 0.95 |
| 12 | 0.92 | 1    | 0.96 | 1    |
| 13 | 0.9  | 0.96 | 0.93 | 0.96 |
| 14 | 1    | 1    | 1    | 1    |
| 15 | 1    | 1    | 1    | 1    |
| 16 | 1    | 1    | 1    | 1    |
| 17 | 0.88 | 0.88 | 0.88 | 0.88 |
| 18 | 0.95 | 0.8  | 0.87 | 0.79 |
| 19 | 0.85 | 0.94 | 0.89 | 0.94 |
| 20 | 1    | 1    | 1    | 1    |
| 21 | 0.98 | 0.94 | 0.96 | 0.93 |
| 22 | 0.98 | 1    | 0.99 | 1    |
| 23 | 0.96 | 1    | 0.98 | 1    |
| 24 | 0.98 | 0.98 | 0.98 | 0.97 |
| 25 | 0.96 | 1    | 0.98 | 1    |
| 26 | 1    | 0.96 | 0.98 | 0.96 |
| 27 | 1    | 0.98 | 0.99 | 0.97 |
| 28 | 0.98 | 0.95 | 0.96 | 0.95 |
| 29 | 0.98 | 0.98 | 0.98 | 0.97 |
| 30 | 1    | 1    | 1    | 1    |
| 31 | 0.96 | 1    | 0.98 | 1    |
| 32 | 0.91 | 0.96 | 0.93 | 0.96 |
| 33 | 1    | 0.96 | 0.98 | 0.95 |
| 34 | 1    | 0.96 | 0.98 | 0.96 |
| 35 | 1    | 0.98 | 0.99 | 0.97 |
| 36 | 1    | 0.88 | 0.94 | 0.88 |
| 37 | 0.96 | 1    | 0.98 | 1    |
| 38 | 0.96 | 1    | 0.98 | 1    |
| 39 | 0.97 | 0.88 | 0.93 | 0.88 |
| 40 | 0.89 | 0.66 | 0.76 | 0.65 |
| 41 | 0.88 | 0.84 | 0.86 | 0.84 |
| 42 | 0.96 | 1    | 0.98 | 1    |
| 43 | 0.96 | 0.94 | 0.95 | 0.94 |
| 44 | 0.96 | 0.9  | 0.92 | 0.89 |
| 45 | 1    | 1    | 1    | 1    |
| 46 | 0.98 | 0.94 | 0.96 | 0.93 |
| 47 | 1    | 0.98 | 0.99 | 0.97 |
| 48 | 1    | 1    | 1    | 1    |
| 49 | 1    | 0.94 | 0.97 | 0.94 |
| 50 | 0.98 | 0.98 | 0.98 | 0.97 |
| 51 | 0.81 | 0.76 | 0.78 | 0.76 |
| 52 | 1    | 0.98 | 0.99 | 0.98 |
| 53 | 0.93 | 1    | 0.96 | 1    |



|    |      |      |      |      |
|----|------|------|------|------|
| 54 | 0.96 | 0.86 | 0.91 | 0.85 |
| 55 | 0.98 | 0.95 | 0.97 | 0.95 |
| 56 | 0.97 | 0.95 | 0.96 | 0.95 |
| 57 | 0.9  | 1    | 0.95 | 1    |
| 58 | 0.97 | 0.93 | 0.95 | 0.93 |
| 59 | 1    | 1    | 1    | 1    |
| 60 | 1    | 1    | 1    | 1    |
| 61 | 0.8  | 0.77 | 0.78 | 0.76 |
| 62 | 0.88 | 0.84 | 0.86 | 0.84 |
| 63 | 0.97 | 0.85 | 0.91 | 0.85 |
| 64 | 0.87 | 0.96 | 0.91 | 0.96 |
| 65 | 0.86 | 1    | 0.93 | 1    |
| 66 | 0.81 | 0.93 | 0.87 | 0.93 |
| 67 | 0.98 | 0.98 | 0.98 | 0.97 |
| 68 | 0.98 | 1    | 0.99 | 1    |
| 69 | 0.98 | 0.96 | 0.97 | 0.95 |
| 70 | 0.98 | 1    | 0.99 | 1    |
| 71 | 0.93 | 0.8  | 0.86 | 0.8  |
| 72 | 0.98 | 0.96 | 0.97 | 0.95 |
| 73 | 1    | 0.93 | 0.96 | 0.93 |
| 74 | 1    | 0.93 | 0.96 | 0.92 |
| 75 | 0.92 | 0.96 | 0.94 | 0.95 |
| 76 | 1    | 0.98 | 0.99 | 0.98 |
| 77 | 1    | 0.96 | 0.98 | 0.95 |
| 78 | 0.93 | 1    | 0.96 | 1    |
| 79 | 1    | 0.96 | 0.98 | 0.96 |
| 80 | 0.96 | 0.92 | 0.94 | 0.92 |
| 81 | 0.88 | 0.95 | 0.92 | 0.95 |
| 82 | 0.96 | 1    | 0.98 | 1    |
| 83 | 0.92 | 0.92 | 0.92 | 0.91 |
| 84 | 0.98 | 1    | 0.99 | 1    |
| 85 | 1    | 1    | 1    | 1    |
| 86 | 0.96 | 0.88 | 0.92 | 0.88 |
| 87 | 0.89 | 0.96 | 0.92 | 0.96 |
| 88 | 0.7  | 0.7  | 0.7  | 0.7  |
| 89 | 0.94 | 0.97 | 0.95 | 0.96 |
| 90 | 1    | 0.93 | 0.97 | 0.93 |
| 91 | 0.95 | 1    | 0.98 | 1    |
| 92 | 1    | 0.96 | 0.98 | 0.95 |
| 93 | 0.98 | 1    | 0.99 | 1    |
| 94 | 0.94 | 0.92 | 0.93 | 0.91 |
| 95 | 1    | 1    | 1    | 1    |
| 96 | 0.92 | 0.96 | 0.94 | 0.96 |

|     |      |      |      |      |
|-----|------|------|------|------|
| 97  | 1    | 0.98 | 0.99 | 0.97 |
| 98  | 0.89 | 0.96 | 0.92 | 0.96 |
| 99  | 0.94 | 1    | 0.97 | 1    |
| 100 | 0.94 | 0.98 | 0.96 | 0.98 |
| 101 | 1    | 1    | 1    | 1    |
| 102 | 0.98 | 0.96 | 0.97 | 0.96 |
| 103 | 0.98 | 0.98 | 0.98 | 0.98 |
| 104 | 1    | 1    | 1    | 1    |
| 105 | 0.98 | 0.98 | 0.98 | 0.98 |
| 106 | 0.92 | 1    | 0.96 | 1    |
| 107 | 0.94 | 1    | 0.97 | 1    |
| 108 | 0.96 | 1    | 0.98 | 1    |
| 109 | 0.95 | 1    | 0.97 | 1    |
| 110 | 1    | 0.98 | 0.99 | 0.97 |
| 111 | 0.98 | 0.95 | 0.96 | 0.95 |
| 112 | 1    | 1    | 1    | 1    |
| 113 | 0.98 | 0.98 | 0.98 | 0.98 |
| 114 | 0.98 | 0.97 | 0.97 | 0.96 |
| 115 | 1    | 0.95 | 0.97 | 0.95 |
| 116 | 0.94 | 0.97 | 0.95 | 0.96 |
| 117 | 0.98 | 0.95 | 0.97 | 0.95 |
| 118 | 0.95 | 1    | 0.98 | 1    |
| 119 | 0.94 | 0.98 | 0.96 | 0.98 |
| 120 | 0.94 | 0.97 | 0.95 | 0.96 |
| 121 | 0.9  | 0.93 | 0.92 | 0.93 |
| 122 | 0.98 | 0.98 | 0.98 | 0.98 |
| 123 | 0.6  | 0.6  | 0.6  | 0.6  |
| 124 | 0.98 | 0.97 | 0.97 | 0.96 |
| 125 | 1    | 0.98 | 0.99 | 0.98 |
| 126 | 0.97 | 0.95 | 0.96 | 0.95 |
| 127 | 1    | 1    | 1    | 1    |
| 128 | 0.97 | 0.95 | 0.96 | 0.95 |
| 129 | 1    | 0.97 | 0.98 | 0.96 |
| 130 | 0.97 | 0.98 | 0.98 | 0.98 |
| 131 | 1    | 0.98 | 0.99 | 0.98 |
| 132 | 1    | 1    | 1    | 1    |
| 133 | 0.98 | 0.97 | 0.97 | 0.96 |
| 134 | 0.86 | 0.98 | 0.92 | 0.98 |
| 135 | 0.98 | 0.98 | 0.98 | 0.98 |
| 136 | 0.89 | 0.98 | 0.94 | 0.98 |
| 137 | 0.97 | 0.97 | 0.97 | 0.96 |
| 138 | 1    | 0.97 | 0.98 | 0.96 |
| 139 | 1    | 0.95 | 0.97 | 0.95 |

|     |      |      |      |      |
|-----|------|------|------|------|
| 140 | 0.9  | 0.95 | 0.93 | 0.95 |
| 141 | 0.95 | 0.95 | 0.95 | 0.95 |
| 142 | 0.94 | 0.98 | 0.96 | 0.98 |
| 143 | 0.98 | 1    | 0.99 | 1    |
| 144 | 1    | 0.93 | 0.97 | 0.93 |
| 145 | 0.93 | 0.91 | 0.92 | 0.9  |
| 146 | 0.9  | 0.93 | 0.92 | 0.93 |
| 147 | 0.98 | 0.98 | 0.98 | 0.98 |
| 148 | 0.98 | 0.98 | 0.98 | 0.98 |
| 149 | 0.97 | 1    | 0.98 | 1    |
| 150 | 0.97 | 1    | 0.98 | 1    |
| 151 | 0.95 | 0.95 | 0.95 | 0.95 |
| 152 | 0.98 | 0.9  | 0.94 | 0.9  |
| 153 | 1    | 0.97 | 0.98 | 0.96 |
| 154 | 0.98 | 0.98 | 0.98 | 0.98 |
| 155 | 0.97 | 0.97 | 0.97 | 0.96 |
| 156 | 0.89 | 0.94 | 0.91 | 0.94 |
| 157 | 0.92 | 0.95 | 0.93 | 0.95 |
| 158 | 0.97 | 0.97 | 0.97 | 0.96 |
| 159 | 0.97 | 1    | 0.98 | 1    |
| 160 | 1    | 1    | 1    | 1    |
| 161 | 0.97 | 1    | 0.98 | 1    |
| 162 | 1    | 1    | 1    | 1    |
| 163 | 0.94 | 0.98 | 0.96 | 0.98 |
| 164 | 0.98 | 1    | 0.99 | 1    |
| 165 | 0.98 | 1    | 0.99 | 1    |
| 166 | 1    | 0.95 | 0.97 | 0.95 |
| 167 | 0.98 | 0.98 | 0.98 | 0.98 |
| 168 | 1    | 0.97 | 0.98 | 0.96 |
| 169 | 0.98 | 0.98 | 0.98 | 0.98 |
| 170 | 0.97 | 0.98 | 0.97 | 0.98 |
| 171 | 0.97 | 1    | 0.98 | 1    |
| 172 | 1    | 0.95 | 0.97 | 0.94 |
| 173 | 0.96 | 0.93 | 0.95 | 0.93 |
| 174 | 0.98 | 0.93 | 0.95 | 0.92 |
| 175 | 0.79 | 0.8  | 0.8  | 0.8  |
| 176 | 1    | 0.98 | 0.99 | 0.98 |
| 177 | 0.96 | 1    | 0.98 | 1    |
| 178 | 0.98 | 0.98 | 0.98 | 0.97 |
| 179 | 0.91 | 0.98 | 0.94 | 0.97 |
| 180 | 0.98 | 0.88 | 0.93 | 0.88 |
| 181 | 0.94 | 0.96 | 0.95 | 0.96 |
| 182 | 0.9  | 0.93 | 0.91 | 0.92 |

|     |      |      |      |      |
|-----|------|------|------|------|
| 183 | 0.81 | 0.81 | 0.81 | 0.8  |
| 184 | 0.96 | 1    | 0.98 | 1    |
| 185 | 1    | 0.97 | 0.98 | 0.96 |
| 186 | 0.95 | 0.98 | 0.96 | 0.97 |
| 187 | 1    | 1    | 1    | 1    |
| 188 | 0.98 | 1    | 0.99 | 1    |
| 189 | 0.86 | 0.95 | 0.9  | 0.95 |
| 190 | 0.98 | 0.91 | 0.94 | 0.9  |
| 191 | 0.94 | 0.91 | 0.93 | 0.9  |
| 192 | 0.98 | 0.98 | 0.98 | 0.98 |
| 193 | 0.96 | 1    | 0.98 | 1    |
| 194 | 0.96 | 1    | 0.98 | 1    |
| 195 | 0.94 | 1    | 0.97 | 1    |
| 196 | 1    | 0.88 | 0.93 | 0.87 |
| 197 | 0.93 | 0.93 | 0.93 | 0.93 |
| 198 | 0.96 | 0.92 | 0.94 | 0.92 |
| 199 | 0.94 | 0.96 | 0.95 | 0.96 |
| 200 | 1    | 0.94 | 0.97 | 0.94 |
| 201 | 0.98 | 1    | 0.99 | 1    |
| 202 | 0.85 | 0.88 | 0.87 | 0.88 |
| 203 | 0.97 | 0.97 | 0.97 | 0.96 |
| 204 | 0.93 | 1    | 0.96 | 1    |
| 205 | 0.96 | 1    | 0.98 | 1    |
| 206 | 0.98 | 0.96 | 0.97 | 0.96 |
| 207 | 0.96 | 1    | 0.98 | 1    |
| 208 | 0.98 | 0.98 | 0.98 | 0.98 |
| 209 | 0.96 | 0.94 | 0.95 | 0.94 |
| 210 | 0.98 | 0.89 | 0.93 | 0.88 |
| 211 | 1    | 0.98 | 0.99 | 0.98 |
| 212 | 0.96 | 0.96 | 0.96 | 0.95 |
| 213 | 1    | 0.98 | 0.99 | 0.98 |
| 214 | 0.98 | 0.98 | 0.98 | 0.98 |
| 215 | 0.98 | 0.93 | 0.95 | 0.93 |
| 216 | 0.96 | 0.98 | 0.97 | 0.98 |
| 217 | 0.93 | 0.87 | 0.9  | 0.87 |
| 218 | 1    | 0.98 | 0.99 | 0.98 |
| 219 | 1    | 1    | 1    | 1    |
| 220 | 1    | 1    | 1    | 1    |
| 221 | 0.96 | 0.96 | 0.96 | 0.96 |
| 222 | 0.87 | 0.93 | 0.9  | 0.92 |
| 223 | 0.89 | 0.98 | 0.93 | 0.98 |
| 224 | 0.96 | 1    | 0.98 | 1    |
| 225 | 0.98 | 0.98 | 0.98 | 0.97 |

|     |      |      |      |      |
|-----|------|------|------|------|
| 226 | 0.88 | 0.92 | 0.9  | 0.92 |
| 227 | 0.96 | 0.96 | 0.96 | 0.96 |
| 228 | 0.98 | 0.98 | 0.98 | 0.98 |
| 229 | 0.98 | 0.98 | 0.98 | 0.98 |
| 230 | 1    | 0.93 | 0.96 | 0.93 |
| 231 | 0.97 | 0.97 | 0.97 | 0.97 |
| 232 | 1    | 1    | 1    | 1    |
| 233 | 0.98 | 0.9  | 0.94 | 0.9  |
| 234 | 0.96 | 0.9  | 0.93 | 0.89 |
| 235 | 1    | 0.96 | 0.98 | 0.96 |
| 236 | 0.94 | 0.91 | 0.93 | 0.91 |
| 237 | 0.62 | 0.63 | 0.62 | 0.63 |
| 238 | 0.9  | 1    | 0.95 | 1    |
| 239 | 0.94 | 0.94 | 0.94 | 0.94 |
| 240 | 0.77 | 0.77 | 0.77 | 0.76 |
| 241 | 1    | 0.84 | 0.91 | 0.84 |
| 242 | 0.97 | 1    | 0.98 | 1    |
| 243 | 0.98 | 0.98 | 0.98 | 0.97 |
| 244 | 0.91 | 0.96 | 0.93 | 0.96 |
| 245 | 0.96 | 1    | 0.98 | 1    |
| 246 | 0.96 | 1    | 0.98 | 1    |
| 247 | 1    | 0.95 | 0.97 | 0.95 |
| 248 | 1    | 1    | 1    | 1    |
| 249 | 0.81 | 0.92 | 0.86 | 0.92 |
| 250 | 1    | 0.98 | 0.99 | 0.98 |
| 251 | 1    | 0.98 | 0.99 | 0.98 |
| 252 | 1    | 0.88 | 0.94 | 0.88 |
| 253 | 0.93 | 1    | 0.97 | 1    |
| 254 | 1    | 0.96 | 0.98 | 0.96 |
| 255 | 1    | 1    | 1    | 1    |

Dataset-8

| Class | Precision | Recall | F1-Score | Accuracy |
|-------|-----------|--------|----------|----------|
| 0     | 1         | 1      | 1        | 1        |
| 1     | 1         | 1      | 1        | 1        |
| 2     | 0.98      | 1      | 0.99     | 1        |
| 3     | 1         | 1      | 1        | 1        |
| 4     | 0.96      | 1      | 0.98     | 1        |
| 5     | 0.93      | 1      | 0.96     | 1        |
| 6     | 1         | 0.96   | 0.98     | 0.96     |
| 7     | 0.96      | 1      | 0.98     | 1        |
| 8     | 0.96      | 0.96   | 0.96     | 0.96     |

|    |      |     |      |     |
|----|------|-----|------|-----|
| 9  | 1    | 1   | 1    | 1   |
| 10 | 1    | 1   | 1    | 1   |
| 11 | 1    | 1   | 1    | 1   |
| 12 | 0.98 | 1   | 0.99 | 1   |
| 13 | 0.96 | 1   | 0.98 | 1   |
| 14 | 0.96 | 1   | 0.98 | 1   |
| 15 | 1    | 1   | 1    | 1   |
| 16 | 1    | 1   | 1    | 1   |
| 17 | 0.96 | 1   | 0.98 | 1   |
| 18 | 1    | 1   | 1    | 1   |
| 19 | 1    | 1   | 1    | 1   |
| 20 | 1    | 1   | 1    | 1   |
| 21 | 1    | 1   | 1    | 1   |
| 22 | 1    | 1   | 1    | 1   |
| 23 | 0.98 | 1   | 0.99 | 1   |
| 24 | 0.98 | 1   | 0.99 | 1   |
| 25 | 0.96 | 1   | 0.98 | 1   |
| 26 | 1    | 1   | 1    | 1   |
| 27 | 1    | 1   | 1    | 1   |
| 28 | 1    | 1   | 1    | 1   |
| 29 | 1    | 1   | 1    | 1   |
| 30 | 1    | 1   | 1    | 1   |
| 31 | 1    | 1   | 1    | 1   |
| 32 | 1    | 1   | 1    | 1   |
| 33 | 1    | 1   | 1    | 1   |
| 34 | 1    | 1   | 1    | 1   |
| 35 | 1    | 1   | 1    | 1   |
| 36 | 1    | 1   | 1    | 1   |
| 37 | 1    | 1   | 1    | 1   |
| 38 | 1    | 1   | 1    | 1   |
| 39 | 0.98 | 1   | 0.99 | 1   |
| 40 | 0.89 | 0.7 | 0.78 | 0.7 |
| 41 | 1    | 1   | 1    | 1   |
| 42 | 1    | 1   | 1    | 1   |
| 43 | 1    | 1   | 1    | 1   |
| 44 | 1    | 1   | 1    | 1   |
| 45 | 1    | 1   | 1    | 1   |
| 46 | 1    | 1   | 1    | 1   |
| 47 | 0.98 | 1   | 0.99 | 1   |
| 48 | 0.95 | 1   | 0.98 | 1   |
| 49 | 0.98 | 1   | 0.99 | 1   |
| 50 | 1    | 1   | 1    | 1   |
| 51 | 0.98 | 1   | 0.99 | 1   |

|    |      |      |      |      |
|----|------|------|------|------|
| 52 | 1    | 1    | 1    | 1    |
| 53 | 0.96 | 1    | 0.98 | 1    |
| 54 | 1    | 1    | 1    | 1    |
| 55 | 1    | 0.98 | 0.99 | 0.97 |
| 56 | 1    | 1    | 1    | 1    |
| 57 | 1    | 1    | 1    | 1    |
| 58 | 1    | 1    | 1    | 1    |
| 59 | 1    | 1    | 1    | 1    |
| 60 | 0.96 | 1    | 0.98 | 1    |
| 61 | 1    | 1    | 1    | 1    |
| 62 | 1    | 1    | 1    | 1    |
| 63 | 1    | 1    | 1    | 1    |
| 64 | 1    | 1    | 1    | 1    |
| 65 | 0.94 | 1    | 0.97 | 1    |
| 66 | 0.79 | 0.93 | 0.85 | 0.93 |
| 67 | 0.96 | 1    | 0.98 | 1    |
| 68 | 1    | 1    | 1    | 1    |
| 69 | 1    | 1    | 1    | 1    |
| 70 | 1    | 1    | 1    | 1    |
| 71 | 0.9  | 1    | 0.95 | 1    |
| 72 | 1    | 1    | 1    | 1    |
| 73 | 1    | 1    | 1    | 1    |
| 74 | 1    | 1    | 1    | 1    |
| 75 | 1    | 1    | 1    | 1    |
| 76 | 1    | 1    | 1    | 1    |
| 77 | 1    | 1    | 1    | 1    |
| 78 | 1    | 1    | 1    | 1    |
| 79 | 0.96 | 1    | 0.98 | 1    |
| 80 | 1    | 1    | 1    | 1    |
| 81 | 0.98 | 1    | 0.99 | 1    |
| 82 | 1    | 1    | 1    | 1    |
| 83 | 1    | 1    | 1    | 1    |
| 84 | 1    | 1    | 1    | 1    |
| 85 | 1    | 1    | 1    | 1    |
| 86 | 1    | 1    | 1    | 1    |
| 87 | 1    | 1    | 1    | 1    |
| 88 | 0.86 | 0.82 | 0.84 | 0.81 |
| 89 | 1    | 1    | 1    | 1    |
| 90 | 0.94 | 1    | 0.97 | 1    |
| 91 | 1    | 1    | 1    | 1    |
| 92 | 1    | 1    | 1    | 1    |
| 93 | 1    | 0.98 | 0.99 | 0.97 |
| 94 | 0.98 | 0.94 | 0.96 | 0.93 |

|     |      |      |      |      |
|-----|------|------|------|------|
| 95  | 0.98 | 1    | 0.99 | 1    |
| 96  | 0.98 | 0.98 | 0.98 | 0.98 |
| 97  | 0.96 | 1    | 0.98 | 1    |
| 98  | 0.94 | 0.98 | 0.96 | 0.98 |
| 99  | 0.98 | 0.94 | 0.96 | 0.94 |
| 100 | 0.94 | 0.98 | 0.96 | 0.98 |
| 101 | 1    | 1    | 1    | 1    |
| 102 | 1    | 1    | 1    | 1    |
| 103 | 0.98 | 1    | 0.99 | 1    |
| 104 | 1    | 1    | 1    | 1    |
| 105 | 1    | 0.98 | 0.99 | 0.97 |
| 106 | 0.94 | 0.98 | 0.96 | 0.98 |
| 107 | 0.96 | 1    | 0.98 | 1    |
| 108 | 0.98 | 1    | 0.99 | 1    |
| 109 | 0.98 | 0.96 | 0.97 | 0.96 |
| 110 | 0.96 | 0.98 | 0.97 | 0.97 |
| 111 | 0.98 | 0.98 | 0.98 | 0.97 |
| 112 | 1    | 0.96 | 0.98 | 0.96 |
| 113 | 1    | 0.98 | 0.99 | 0.98 |
| 114 | 0.98 | 0.97 | 0.97 | 0.96 |
| 115 | 1    | 0.95 | 0.97 | 0.95 |
| 116 | 0.95 | 0.97 | 0.96 | 0.96 |
| 117 | 0.97 | 0.95 | 0.96 | 0.95 |
| 118 | 0.95 | 0.98 | 0.97 | 0.98 |
| 119 | 0.94 | 0.98 | 0.96 | 0.98 |
| 120 | 0.96 | 0.92 | 0.94 | 0.91 |
| 121 | 0.97 | 0.93 | 0.95 | 0.93 |
| 122 | 0.98 | 0.97 | 0.97 | 0.96 |
| 123 | 0.81 | 0.75 | 0.78 | 0.75 |
| 124 | 1    | 0.98 | 0.99 | 0.98 |
| 125 | 1    | 0.98 | 0.99 | 0.98 |
| 126 | 0.98 | 0.97 | 0.97 | 0.96 |
| 127 | 0.98 | 1    | 0.99 | 1    |
| 128 | 0.97 | 0.97 | 0.97 | 0.96 |
| 129 | 1    | 0.98 | 0.99 | 0.98 |
| 130 | 0.97 | 0.98 | 0.98 | 0.98 |
| 131 | 1    | 1    | 1    | 1    |
| 132 | 0.98 | 1    | 0.99 | 1    |
| 133 | 0.97 | 0.97 | 0.97 | 0.96 |
| 134 | 0.94 | 0.98 | 0.96 | 0.98 |
| 135 | 1    | 1    | 1    | 1    |
| 136 | 0.89 | 0.98 | 0.94 | 0.98 |
| 137 | 0.98 | 0.97 | 0.97 | 0.96 |



|     |      |      |      |      |
|-----|------|------|------|------|
| 138 | 1    | 0.95 | 0.97 | 0.95 |
| 139 | 1    | 0.95 | 0.97 | 0.95 |
| 140 | 0.94 | 0.97 | 0.95 | 0.96 |
| 141 | 0.95 | 0.97 | 0.96 | 0.96 |
| 142 | 0.94 | 0.98 | 0.96 | 0.98 |
| 143 | 1    | 0.98 | 0.99 | 0.98 |
| 144 | 0.98 | 0.93 | 0.96 | 0.93 |
| 145 | 0.95 | 0.93 | 0.94 | 0.93 |
| 146 | 0.96 | 0.92 | 0.94 | 0.91 |
| 147 | 0.98 | 0.98 | 0.98 | 0.98 |
| 148 | 0.98 | 0.98 | 0.98 | 0.98 |
| 149 | 1    | 1    | 1    | 1    |
| 150 | 0.97 | 1    | 0.98 | 1    |
| 151 | 0.95 | 0.95 | 0.95 | 0.95 |
| 152 | 0.98 | 0.9  | 0.94 | 0.9  |
| 153 | 1    | 0.98 | 0.99 | 0.98 |
| 154 | 1    | 0.98 | 0.99 | 0.98 |
| 155 | 1    | 0.97 | 0.98 | 0.96 |
| 156 | 0.96 | 1    | 0.98 | 1    |
| 157 | 0.92 | 0.97 | 0.94 | 0.96 |
| 158 | 0.97 | 0.97 | 0.97 | 0.96 |
| 159 | 0.97 | 1    | 0.98 | 1    |
| 160 | 1    | 1    | 1    | 1    |
| 161 | 1    | 1    | 1    | 1    |
| 162 | 1    | 1    | 1    | 1    |
| 163 | 0.94 | 0.98 | 0.96 | 0.98 |
| 164 | 0.98 | 0.98 | 0.98 | 0.98 |
| 165 | 0.98 | 1    | 0.99 | 1    |
| 166 | 0.98 | 0.95 | 0.97 | 0.95 |
| 167 | 0.96 | 0.98 | 0.97 | 0.97 |
| 168 | 0.98 | 0.97 | 0.97 | 0.96 |
| 169 | 0.98 | 0.98 | 0.98 | 0.98 |
| 170 | 0.98 | 0.98 | 0.98 | 0.98 |
| 171 | 0.97 | 1    | 0.98 | 1    |
| 172 | 1    | 0.93 | 0.96 | 0.92 |
| 173 | 0.95 | 0.95 | 0.95 | 0.94 |
| 174 | 0.98 | 0.95 | 0.96 | 0.94 |
| 175 | 1    | 0.98 | 0.99 | 0.98 |
| 176 | 1    | 1    | 1    | 1    |
| 177 | 1    | 1    | 1    | 1    |
| 178 | 0.97 | 0.95 | 0.96 | 0.95 |
| 179 | 1    | 0.98 | 0.99 | 0.97 |
| 180 | 0.94 | 0.92 | 0.93 | 0.92 |

|     |      |      |      |      |
|-----|------|------|------|------|
| 181 | 1    | 0.98 | 0.99 | 0.98 |
| 182 | 0.87 | 0.74 | 0.8  | 0.74 |
| 183 | 0.79 | 0.92 | 0.85 | 0.92 |
| 184 | 0.96 | 0.92 | 0.94 | 0.92 |
| 185 | 0.94 | 1    | 0.97 | 1    |
| 186 | 0.97 | 0.93 | 0.95 | 0.92 |
| 187 | 0.95 | 1    | 0.98 | 1    |
| 188 | 1    | 1    | 1    | 1    |
| 189 | 0.96 | 1    | 0.98 | 1    |
| 190 | 0.94 | 1    | 0.97 | 1    |
| 191 | 0.96 | 0.98 | 0.97 | 0.98 |
| 192 | 0.98 | 0.94 | 0.96 | 0.94 |
| 193 | 1    | 1    | 1    | 1    |
| 194 | 1    | 0.96 | 0.98 | 0.96 |
| 195 | 1    | 1    | 1    | 1    |
| 196 | 0.95 | 1    | 0.98 | 1    |
| 197 | 0.93 | 0.96 | 0.95 | 0.96 |
| 198 | 0.96 | 0.92 | 0.94 | 0.92 |
| 199 | 0.96 | 0.98 | 0.97 | 0.98 |
| 200 | 1    | 1    | 1    | 1    |
| 201 | 1    | 1    | 1    | 1    |
| 202 | 0.92 | 0.88 | 0.9  | 0.88 |
| 203 | 0.96 | 0.93 | 0.95 | 0.93 |
| 204 | 0.97 | 0.93 | 0.95 | 0.92 |
| 205 | 1    | 0.96 | 0.98 | 0.96 |
| 206 | 1    | 0.98 | 0.99 | 0.98 |
| 207 | 0.96 | 1    | 0.98 | 1    |
| 208 | 1    | 1    | 1    | 1    |
| 209 | 0.96 | 0.96 | 0.96 | 0.95 |
| 210 | 1    | 0.98 | 0.99 | 0.97 |
| 211 | 1    | 0.98 | 0.99 | 0.98 |
| 212 | 1    | 1    | 1    | 1    |
| 213 | 1    | 0.96 | 0.98 | 0.96 |
| 214 | 0.98 | 0.98 | 0.98 | 0.98 |
| 215 | 1    | 0.93 | 0.96 | 0.93 |
| 216 | 1    | 1    | 1    | 1    |
| 217 | 0.98 | 0.98 | 0.98 | 0.97 |
| 218 | 1    | 1    | 1    | 1    |
| 219 | 1    | 1    | 1    | 1    |
| 220 | 1    | 1    | 1    | 1    |
| 221 | 1    | 0.96 | 0.98 | 0.96 |
| 222 | 1    | 1    | 1    | 1    |
| 223 | 0.9  | 0.92 | 0.91 | 0.91 |

|     |      |      |      |      |
|-----|------|------|------|------|
| 224 | 0.98 | 0.98 | 0.98 | 0.97 |
| 225 | 1    | 1    | 1    | 1    |
| 226 | 1    | 0.88 | 0.94 | 0.88 |
| 227 | 0.96 | 1    | 0.98 | 1    |
| 228 | 1    | 1    | 1    | 1    |
| 229 | 1    | 0.98 | 0.99 | 0.98 |
| 230 | 1    | 0.98 | 0.99 | 0.98 |
| 231 | 0.96 | 0.87 | 0.91 | 0.86 |
| 232 | 0.94 | 1    | 0.97 | 1    |
| 233 | 1    | 1    | 1    | 1    |
| 234 | 1    | 0.96 | 0.98 | 0.95 |
| 235 | 1    | 1    | 1    | 1    |
| 236 | 0.98 | 1    | 0.99 | 1    |
| 237 | 0.82 | 0.84 | 0.83 | 0.84 |
| 238 | 1    | 0.98 | 0.99 | 0.97 |
| 239 | 1    | 0.96 | 0.98 | 0.95 |
| 240 | 0.85 | 0.88 | 0.86 | 0.88 |
| 241 | 0.92 | 0.96 | 0.94 | 0.96 |
| 242 | 1    | 0.93 | 0.96 | 0.92 |
| 243 | 1    | 1    | 1    | 1    |
| 244 | 0.98 | 0.98 | 0.98 | 0.97 |
| 245 | 1    | 1    | 1    | 1    |
| 246 | 0.98 | 1    | 0.99 | 1    |
| 247 | 1    | 0.95 | 0.97 | 0.95 |
| 248 | 1    | 1    | 1    | 1    |
| 249 | 1    | 0.92 | 0.96 | 0.91 |
| 250 | 0.98 | 1    | 0.99 | 1    |
| 251 | 1    | 1    | 1    | 1    |
| 252 | 1    | 0.96 | 0.98 | 0.96 |
| 253 | 1    | 1    | 1    | 1    |
| 254 | 1    | 1    | 1    | 1    |
| 255 | 1    | 1    | 1    | 1    |

Ekush Basic

| Class | Precision | Recall | F1-Score | Accuracy |
|-------|-----------|--------|----------|----------|
| 0     | 0.98      | 0.99   | 0.99     | 0.98     |
| 1     | 1         | 0.99   | 0.99     | 0.98     |
| 2     | 0.98      | 0.99   | 0.98     | 0.98     |
| 3     | 0.99      | 0.99   | 0.99     | 0.98     |
| 4     | 0.99      | 0.99   | 0.99     | 0.98     |
| 5     | 1         | 0.99   | 0.99     | 0.98     |
| 6     | 0.99      | 0.99   | 0.99     | 0.98     |

|    |      |      |      |      |
|----|------|------|------|------|
| 7  | 1    | 0.98 | 0.99 | 0.97 |
| 8  | 1    | 0.99 | 0.99 | 0.98 |
| 9  | 0.99 | 0.99 | 0.99 | 0.98 |
| 10 | 1    | 0.99 | 0.99 | 0.98 |
| 11 | 0.98 | 0.99 | 0.99 | 0.98 |
| 12 | 0.99 | 0.99 | 0.99 | 0.98 |
| 13 | 1    | 0.98 | 0.99 | 0.98 |
| 14 | 0.96 | 0.99 | 0.97 | 0.98 |
| 15 | 0.99 | 0.97 | 0.98 | 0.96 |
| 16 | 0.99 | 0.99 | 0.99 | 0.98 |
| 17 | 0.98 | 0.99 | 0.98 | 0.98 |
| 18 | 0.98 | 0.99 | 0.98 | 0.98 |
| 19 | 1    | 0.99 | 0.99 | 0.98 |
| 20 | 0.99 | 0.99 | 0.99 | 0.99 |
| 21 | 0.99 | 0.99 | 0.99 | 0.98 |
| 22 | 0.88 | 0.99 | 0.93 | 0.98 |
| 23 | 0.98 | 0.99 | 0.98 | 0.98 |
| 24 | 0.98 | 0.99 | 0.99 | 0.98 |
| 25 | 1    | 0.99 | 0.99 | 0.98 |
| 26 | 1    | 0.98 | 0.99 | 0.97 |
| 27 | 1    | 0.99 | 0.99 | 0.98 |
| 28 | 0.98 | 0.96 | 0.97 | 0.96 |
| 29 | 0.99 | 0.99 | 0.99 | 0.98 |
| 30 | 0.99 | 0.98 | 0.99 | 0.97 |
| 31 | 0.99 | 0.99 | 0.99 | 0.98 |
| 32 | 0.99 | 0.94 | 0.97 | 0.94 |
| 33 | 0.98 | 0.99 | 0.98 | 0.98 |
| 34 | 0.97 | 0.98 | 0.98 | 0.98 |
| 35 | 0.99 | 0.99 | 0.99 | 0.98 |
| 36 | 1    | 0.98 | 0.99 | 0.97 |
| 37 | 0.99 | 0.9  | 0.94 | 0.89 |
| 38 | 0.99 | 0.99 | 0.99 | 0.98 |
| 39 | 0.98 | 0.98 | 0.98 | 0.98 |
| 40 | 0.99 | 0.99 | 0.99 | 0.98 |
| 41 | 0.99 | 0.99 | 0.99 | 0.98 |
| 42 | 0.98 | 0.99 | 0.99 | 0.98 |
| 43 | 0.99 | 0.98 | 0.99 | 0.98 |
| 44 | 0.95 | 0.99 | 0.97 | 0.98 |
| 45 | 1    | 0.99 | 0.99 | 0.98 |
| 46 | 0.98 | 0.99 | 0.98 | 0.98 |
| 47 | 0.98 | 0.99 | 0.98 | 0.99 |
| 48 | 0.99 | 0.99 | 0.99 | 0.98 |
| 49 | 0.93 | 0.99 | 0.96 | 0.98 |

### Ekush Numerals

| Class | Precision | Recall | F1-Score | Accuracy |
|-------|-----------|--------|----------|----------|
| 0     | 0.99      | 0.99   | 0.99     | 0.99     |
| 1     | 1         | 0.99   | 0.99     | 0.98     |
| 2     | 0.99      | 0.99   | 0.99     | 0.99     |
| 3     | 0.99      | 0.99   | 0.99     | 0.99     |
| 4     | 1         | 0.99   | 1        | 0.99     |
| 5     | 1         | 0.99   | 0.99     | 0.98     |
| 6     | 1         | 0.99   | 0.99     | 0.98     |
| 7     | 0.99      | 0.99   | 0.99     | 0.98     |
| 8     | 1         | 0.99   | 0.99     | 0.99     |
| 9     | 0.96      | 0.99   | 0.98     | 0.99     |

### BanglaLekha Basic

| Class | Precision | Recall | F1-Score | Accuracy |
|-------|-----------|--------|----------|----------|
| 0     | 0.98      | 0.93   | 0.95     | 0.92     |
| 1     | 0.99      | 0.97   | 0.98     | 0.97     |
| 2     | 0.96      | 0.99   | 0.98     | 0.98     |
| 3     | 0.99      | 0.97   | 0.98     | 0.96     |
| 4     | 0.98      | 0.96   | 0.97     | 0.95     |
| 5     | 0.98      | 0.96   | 0.97     | 0.95     |
| 6     | 0.99      | 0.92   | 0.95     | 0.92     |
| 7     | 0.99      | 0.92   | 0.96     | 0.92     |
| 8     | 0.97      | 0.96   | 0.97     | 0.96     |
| 9     | 0.98      | 0.98   | 0.98     | 0.97     |
| 10    | 0.98      | 0.97   | 0.98     | 0.97     |
| 11    | 0.94      | 0.98   | 0.96     | 0.98     |
| 12    | 0.99      | 0.96   | 0.97     | 0.95     |
| 13    | 1         | 0.98   | 0.99     | 0.98     |
| 14    | 0.95      | 0.99   | 0.97     | 0.99     |
| 15    | 0.98      | 0.97   | 0.97     | 0.96     |
| 16    | 0.96      | 0.65   | 0.78     | 0.65     |
| 17    | 0.98      | 0.94   | 0.96     | 0.94     |
| 18    | 0.93      | 0.97   | 0.95     | 0.97     |
| 19    | 0.98      | 0.94   | 0.96     | 0.93     |
| 20    | 0.98      | 0.96   | 0.97     | 0.96     |
| 21    | 0.97      | 1      | 0.98     | 0.99     |
| 22    | 0.76      | 0.99   | 0.86     | 0.98     |
| 23    | 0.97      | 0.98   | 0.98     | 0.98     |
| 24    | 0.97      | 0.98   | 0.97     | 0.97     |

|    |      |      |      |      |
|----|------|------|------|------|
| 25 | 0.99 | 0.97 | 0.98 | 0.97 |
| 26 | 1    | 0.95 | 0.97 | 0.94 |
| 27 | 0.99 | 0.95 | 0.97 | 0.94 |
| 28 | 0.96 | 0.92 | 0.94 | 0.91 |
| 29 | 0.98 | 0.83 | 0.9  | 0.82 |
| 30 | 0.98 | 0.86 | 0.92 | 0.86 |
| 31 | 0.97 | 0.99 | 0.98 | 0.99 |
| 32 | 0.96 | 0.96 | 0.96 | 0.95 |
| 33 | 0.93 | 0.99 | 0.96 | 0.98 |
| 34 | 0.88 | 0.99 | 0.93 | 0.99 |
| 35 | 0.99 | 0.92 | 0.95 | 0.91 |
| 36 | 0.98 | 0.87 | 0.92 | 0.87 |
| 37 | 0.99 | 0.79 | 0.88 | 0.78 |
| 38 | 0.97 | 0.98 | 0.97 | 0.97 |
| 39 | 0.94 | 0.99 | 0.97 | 0.99 |
| 40 | 0.91 | 0.99 | 0.95 | 0.99 |
| 41 | 0.99 | 0.99 | 0.99 | 0.98 |
| 42 | 0.98 | 0.99 | 0.99 | 0.99 |
| 43 | 1    | 0.99 | 1    | 0.99 |
| 44 | 0.95 | 0.97 | 0.96 | 0.97 |
| 45 | 0.99 | 0.99 | 0.99 | 0.99 |
| 46 | 0.86 | 0.97 | 0.91 | 0.97 |
| 47 | 0.98 | 0.99 | 0.99 | 0.99 |
| 48 | 0.99 | 0.96 | 0.98 | 0.96 |
| 49 | 0.94 | 0.98 | 0.96 | 0.97 |

BanglaLekha Numerals

| Class | Precision | Recall | F1-Score | Accuracy |
|-------|-----------|--------|----------|----------|
| 0     | 0.98      | 0.98   | 0.98     | 0.97     |
| 1     | 1         | 0.98   | 0.99     | 0.97     |
| 2     | 0.98      | 0.98   | 0.98     | 0.97     |
| 3     | 0.99      | 0.98   | 0.98     | 0.97     |
| 4     | 1         | 0.98   | 0.99     | 0.97     |
| 5     | 0.99      | 0.98   | 0.98     | 0.97     |
| 6     | 0.98      | 0.98   | 0.98     | 0.97     |
| 7     | 0.97      | 0.99   | 0.98     | 0.99     |
| 8     | 0.98      | 0.98   | 0.98     | 0.98     |
| 9     | 0.95      | 0.98   | 0.97     | 0.98     |

NumtaDB Numerals

| Class | Precision | Recall | F1-Score | Accuracy |
|-------|-----------|--------|----------|----------|
|-------|-----------|--------|----------|----------|

|   |      |      |      |      |
|---|------|------|------|------|
| 0 | 0.98 | 0.97 | 0.98 | 0.97 |
| 1 | 1    | 0.97 | 0.99 | 0.97 |
| 2 | 0.99 | 0.97 | 0.98 | 0.97 |
| 3 | 0.98 | 0.97 | 0.97 | 0.97 |
| 4 | 0.99 | 0.97 | 0.98 | 0.97 |
| 5 | 0.98 | 0.97 | 0.98 | 0.97 |
| 6 | 0.98 | 0.97 | 0.98 | 0.97 |
| 7 | 0.91 | 0.99 | 0.95 | 0.98 |
| 8 | 0.99 | 0.98 | 0.98 | 0.97 |
| 9 | 0.97 | 0.97 | 0.97 | 0.96 |
